# Supplementary material for: Delineating tesamorelin response pathways in HIV-associated NAFLD using a targeted proteomic and transcriptomic approach
Source: PubMed Central journal article supplement (PMC8131688; doi:10.1038/s41598-021-89966-y), 2021-05-18
Supplement: 41598_2021_89966_MOESM1_ESM.pdf [file 41598_2021_89966_MOESM1_ESM.pdf]

**Supplementary Table 1: Baseline Demographic and Clinical Characteristics**

|                                    | Overall Sample          |                     | Subset with Paired Protein Panels |                     |
|------------------------------------|-------------------------|---------------------|-----------------------------------|---------------------|
|                                    | Tesamorelin<br>(n = 31) | Placebo<br>(n = 30) | Tesamorelin<br>(n = 20)           | Placebo<br>(n = 24) |
| Age (years)                        | 52 ± 8                  | 54 ± 7              | 53 ± 6                            | 54 ± 7              |
| % Male                             | 77                      | 80                  | 70                                | 79                  |
| % Race                             |                         |                     |                                   |                     |
| White                              | 68                      | 63                  | 55                                | 71                  |
| Black                              | 26                      | 33                  | 40                                | 29                  |
| Other                              | 6                       | 3                   | 5                                 | 0                   |
| % Hispanic                         | 19                      | 10                  | 10                                | 8                   |
| Duration of HIV infection (years)  | 16 ± 9                  | 18 ± 8              | 17 ± 10                           | 18 ± 8              |
| CD4 count (cells/mm <sup>3</sup> ) | 733 ± 290               | 798 ± 260           | 740 ± 265                         | 792 ± 269           |
| log HIV viral load                 | 0.34 ± 0.59             | 0.50 ± 0.74         | 0.39 ± 0.61                       | 0.41 ± 0.66         |
| % Current Antiretroviral Use       |                         |                     |                                   |                     |
| NRTI                               | 87                      | 97                  | 85                                | 96                  |
| NNRTI                              | 39                      | 37                  | 30                                | 38                  |
| PI                                 | 29                      | 20                  | 25                                | 25                  |
| Integrase Inhibitor                | 68                      | 60                  | 80                                | 58                  |
| % Type 2 Diabetes                  | 13                      | 13                  | 5                                 | 13                  |
| Liver biopsy length (mm)           | 13 ± 3                  | 13 ± 3              | 14 ± 2                            | 13 ± 3              |
| Hepatic Fat Fraction (%)           | 13 ± 8                  | 15 ± 9              | 15 ± 9                            | 15 ± 9              |
| % NASH                             | 34                      | 31                  | 22                                | 35                  |
| % Fibrosis                         | 48                      | 38                  | 39                                | 39                  |
| Stage 1                            | 14                      | 17                  | 17                                | 13                  |
| Stage 2                            | 21                      | 14                  | 17                                | 17                  |
| Stage 3                            | 14                      | 7                   | 6                                 | 9                   |

There were no statistically significant differences between treatment groups at baseline for any of the variables shown above.

Continuous variables are presented as mean ± standard deviation.

Abbreviations: NASH, nonalcoholic steatohepatitis; NNRTI, non-nucleoside reverse transcriptase inhibitor; NRTI, nucleoside reverse transcriptase inhibitor; PI, protease inhibitor.

**Supplementary Table 2: Effects of Tesamorelin Versus Placebo on Select Plasma Proteins**

| Plasma Protein | Log <sub>2</sub> -Baseline |                     | Log <sub>2</sub> -Fold Change |                     | P-value      |
|----------------|----------------------------|---------------------|-------------------------------|---------------------|--------------|
|                | Tesamorelin<br>(n = 20)    | Placebo<br>(n = 24) | Tesamorelin<br>(n = 20)       | Placebo<br>(n = 24) |              |
| CASP8          | 4.91 (4.52, 5.30)          | 4.76 (4.39, 5.13)   | -0.37 ± 0.72                  | -0.02 ± 0.65        | 0.10         |
| CCL20          | 7.53 (6.85, 8.21)          | 7.15 (6.62, 7.68)   | -0.28 ± 0.88                  | 0.20 ± 0.79         | 0.06         |
| CRTAM          | 5.71 (5.40, 6.02)          | 6.08 (5.89, 6.27)   | -0.35 ± 0.73                  | -0.04 ± 0.50        | 0.10         |
| CSF1           | 9.84 (9.77, 9.92)          | 9.79 (9.72, 9.85)   | -0.17 ± 0.21                  | 0.02 ± 0.20         | <b>0.004</b> |
| CXCL12         | 1.16 (1.08, 1.25)          | 1.15 (1.10, 1.20)   | -0.03 ± 0.18                  | -0.003 ± 0.17       | 0.54         |
| NCR1           | 3.05 (2.81, 3.29)          | 3.21 (2.99, 3.42)   | -0.20 ± 0.52                  | -0.08 ± 0.31        | 0.37         |
| TGFB1          | 8.99 (8.73, 9.24)          | 8.82 (8.67, 8.98)   | -0.35 ± 0.56                  | -0.05 ± 0.43        | <b>0.05</b>  |
| TNFRSF21       | 7.57 (7.44, 7.71)          | 7.62 (7.52, 7.72)   | -0.13 ± 0.22                  | -0.05 ± 0.23        | 0.25         |
| VEGFA          | 8.13 (7.97, 8.29)          | 7.92 (7.81, 8.03)   | -0.20 ± 0.35                  | 0.05 ± 0.34         | <b>0.02</b>  |

Bold text denotes  $P < 0.05$ . Data are represented as mean (95% confidence interval) or mean ± SD.

Abbreviations: CASP8, caspase 8; CCL20, C-C motif chemokine ligand 20; CRTAM, cytotoxic and regulatory T-cell molecule; CSF1, macrophage colony stimulating factor 1; CXCL12, C-X-C motif chemokine ligand 12; NCR1, natural cytotoxicity triggering receptor 1; TGFB1, transforming growth factor beta 1; TNFRSF21, tumor necrosis factor receptor superfamily member 21; VEGFA, vascular endothelial growth factor A.

**Supplementary Table 3: Relationships of Changes in Plasma Proteins Downregulated by Tesamorelin with Change in NAFLD Severity**

| Log <sub>2</sub> -Fold Change in Plasma Protein | Change in NAS Score                      |                                  | Change in Hepatic Fat Fraction (%) |                                  | Change in Fibrosis-Related Gene Score    |                                   |
|-------------------------------------------------|------------------------------------------|----------------------------------|------------------------------------|----------------------------------|------------------------------------------|-----------------------------------|
|                                                 | <i>Tesamorelin</i><br>(n = 18)           | <i>Placebo</i><br>(n = 22)       | <i>Tesamorelin</i><br>(n = 19)     | <i>Placebo</i><br>(n = 23)       | <i>Tesamorelin</i><br>(n = 17)           | <i>Placebo</i><br>(n = 19)        |
| VEGFA                                           | <i>r</i> = 0.62, <b><i>P</i> = 0.006</b> | <i>r</i> = 0.11, <i>P</i> = 0.62 | <i>r</i> = 0.30, <i>P</i> = 0.22   | <i>r</i> = 0.12, <i>P</i> = 0.57 | <i>r</i> = 0.30, <i>P</i> = 0.24         | <i>r</i> = -0.04, <i>P</i> = 0.86 |
| TGFB1                                           | <i>r</i> = 0.31, <i>P</i> = 0.22         | <i>r</i> = 0.24, <i>P</i> = 0.29 | <i>r</i> = 0.17, <i>P</i> = 0.49   | <i>r</i> = 0.34, <i>P</i> = 0.11 | <i>r</i> = 0.61, <b><i>P</i> = 0.009</b> | <i>r</i> = -0.07, <i>P</i> = 0.79 |
| CSF1                                            | <i>r</i> = 0.50, <b><i>P</i> = 0.04</b>  | <i>r</i> = 0.21, <i>P</i> = 0.35 | <i>r</i> = 0.13, <i>P</i> = 0.60   | <i>r</i> = 0.16, <i>P</i> = 0.46 | <i>r</i> = 0.64, <b><i>P</i> = 0.006</b> | <i>r</i> = 0.29, <i>P</i> = 0.23  |

Bold text denotes  $P < 0.05$ .

Abbreviations: CSF1, macrophage colony stimulating factor 1; NAS, NAFLD activity score; TGFB1, transforming growth factor beta 1; VEGFA, vascular endothelial growth factor A.
